# **Regulation of heme utilization and homeostasis in *Candida albicans***

Natalie Andrawes<sup>1</sup>, Ziva Weissman<sup>1</sup>, Mariel Pinsky<sup>1</sup>, Shilat Moshe<sup>1</sup>, Judith Berman<sup>2</sup> and Daniel Kornitzer<sup>1\*</sup>

<sup>1</sup> Department of Molecular Microbiology, B. Rappaport Faculty of Medicine, Technion – I.I.T., Haifa 31096, Israel; <sup>2</sup> School of Molecular Microbiology and Biotechnology, Faculty of Life Sciences, Tel Aviv University, Tel Aviv, Israel

\* Corresponding author. e-mail: [danielk@technion.ac.il](mailto:danielk@technion.ac.il)

Running title: Heme-regulated transcription in *C. albicans*

Keywords: *Candida albicans*, heme acquisition, Zinc-finger transcription factor, transcriptome

## ABSTRACT

**Heme (iron-protoporphyrin IX) is an essential but potentially toxic cellular cofactor. While most organisms are heme prototrophs, many microorganisms can utilize environmental heme as iron source. The pathogenic yeast *Candida albicans* can utilize host heme in the iron-poor host environment, using an extracellular cascade of soluble anchored hemophores, and plasma membrane ferric reductase-like proteins. To gain additional insight into the *C. albicans* heme uptake pathway, we performed an unbiased genetic selection for mutants resistant to the toxic heme analog Ga<sup>3+</sup>-protoporphyrin IX at neutral pH, and a secondary screen for inability to utilize heme as iron source. Among the mutants isolated were the genes of the pH-responsive RIM pathway, and a zinc finger transcription factor, *HUF1*. In the presence of hemin in the medium, *HUF1* is induced, the Huf1 protein is stabilized and Huf1-GFP localizes to the nucleus. In the *huf1* mutant, cytoplasmic heme levels are elevated, while influx of extracellular heme is lower. Gene expression analysis indicated that in the presence of extracellular hemin, Huf1 activates the heme oxygenase *HMX1*, which breaks down excess cytoplasmic heme, while at the same time it also activates all the known heme uptake genes. These results indicate that Huf1 is a heme-responsive transcription factor that plays a role both in cytoplasmic heme homeostasis and in utilization of extracellular heme. The induction of heme uptake genes by Huf1 under iron satiety indicates that preferential utilization of host heme can be a dietary strategy in a heme prototroph.**

## INTRODUCTION

Heme (iron protoporphyrin IX) is an essential cofactor that is required by almost all known aerobic organisms [1]. As a cofactor, heme mediates numerous catalytic, binding and regulatory functions in the cell [1,2]. However, the hydrophobicity and redox activity of heme make it potentially cytotoxic due to mis-incorporation into certain proteins, disruption of lipid bilayers, or oxidation of biomolecules [3,4].

Most aerobic organisms have the capacity to synthesize heme *de novo* [5]. On the other hand, some organisms, notably protozoan parasites such as *Leishmania* [6], and some metazoans such as the worm *C. elegans* [7], are heme auxotrophs and must assimilate exogenous heme sources for all heme-dependent processes. Among prototrophs, heme may also be acquired from exogenous sources, albeit the extent to which this occurs is cell type- and organism-dependent [1,8]. Furthermore, it is unclear to which degree exogenous heme may be used intact, versus being catabolized to iron that is then recycled for new heme synthesis or any other iron-dependent processes [1].

Iron acquisition is a central challenge for pathogenic microorganisms, which must contend with an environment particularly scarce in iron, due to sequestration mechanisms that drastically limit iron bioavailability in the host [9]. In the human host, ~70% of the iron is bound by the oxygen carrier hemoglobin, as part of its heme prosthetic group [10].

Consequently, many pathogenic microorganisms, bacterial as well as fungal, have evolved mechanisms to exploit host heme, particularly from hemoglobin, as sources of iron [11–13].

*Candida albicans* is a commensal organism of the gastrointestinal tract. It is also one of the most prevalent fungal pathogens, causing superficial mucosal membrane infections in immunocompetent and immunocompromised individuals, as well as life-threatening, systemic infection among immunocompromised or debilitated patients. *C. albicans* can utilize exogenous heme as a source for iron, and furthermore, growth of a *C. albicans* mutant defective in heme synthesis was efficiently restored with exogenous heme, indicating that host heme can potentially be used also as heme source [14,15].

The *C. albicans* heme acquisition system relies on a cascade of extracellular CFEM (Common in Fungal Extracellular Membrane) hemophores, both soluble and cell wall- or cell membrane-bound, and on the ESCRT pathway, endocytosis, and membrane ferric reductase-like proteins [16–19]. The CFEM gene *RBT5* is among the most highly induced genes in experimental animal infection models [20], and Rbt5-specific antibodies are prominent in the

serum of patients recovering from candidemia [21], confirming the importance of the CFEM heme-acquisition pathway in infection. The three secreted CFEM proteins involved in hemoglobin-iron acquisition, Csa2, Rbt5 and Pga7 are soluble, and anchored to the outer-, and to the inner cell envelope, respectively. The observation that these three proteins can all extract heme from hemoglobin and transfer it from one protein to the next [18,19] is consistent with a heme transfer cascade across the cell envelope, followed by internalization via endocytosis [11,17]. Recently, two ferric reductase-like proteins, Frp1 and Frp2, also were identified as necessary for heme utilization and for sensitivity to toxic heme analogs [22].

*C. albicans* is normally a diploid organism lacking a full sexual cycle, making it refractory to forward genetic analysis. However, a stable haploid strain recently described [23], in conjunction with transposon mutagenesis systems [24–26], have made this organism amenable to forward genetics. We took advantage of this system to identify new components and regulators of the heme utilization pathway in *C. albicans*. One of the genes identified, which we characterize here, encodes a zinc finger transcription factor that responds to extracellular heme and regulates both cytoplasmic heme homeostasis and extracellular heme uptake.

## RESULTS

### Identification of mutants defective in hemoglobin utilization

Identification of mutants unable to utilize hemoglobin was done in two stages. In the first stage, we enriched a pool of haploid cells mutagenized with the Ac/Ds transposon from maize [24] for Ga<sup>3+</sup>-protoporphyrin IX (GaPPIX)-resistant clones. GaPPIX is a toxic heme analog that inhibits the growth of bacteria and yeasts [27,28]; in *C. albicans*, GaPPIX toxicity depends on a ferric reductase-like protein involved in heme uptake, Frp2 [22]. The mutagenized pool was serially diluted 1:1000 and outgrown five times in YPD medium pH 7.5, supplemented with 1 mM of the iron chelator ferrozine to elicit expression of heme uptake genes, and containing 150  $\mu$ M GaPPIX. In a second stage, aliquots from each enrichment round were spread on YPD plates and then replica-plated on YPD plates supplemented with the iron chelator BPS (bathophenanthroline disulfonic acid). Mutants unable to grow on hemoglobin as the sole iron source were isolated and characterized for their transposon insertion site. Since we found that in the last three rounds of enrichment, the

pools only contained insertions in *FRP2*, we only replica-plated colonies from the first two rounds.

Table 1 shows the identification of the transposon insertions that were associated with reduced growth on hemoglobin. The vast majority (62/73) fell in eight genes that constitute the RIM pathway, a signal transduction pathway that is activated in neutral or alkaline pH [29] and that was shown to activate, among others, *FRP1* [30,31], which is essential for heme-iron acquisition [22]. Three other genes, *VPS23*, *VPS25*, *VPS36*, encode components of the ESCRT pathway, which was shown to be involved in hemoglobin-iron acquisition [17]. Seven other genes occurred once, including *FRP2*. *FRP2* is the gene most strongly selected for by GaPPIX, however *FRP2* mutants are generally not defective in heme uptake in regular YPD medium [22]. A single insertion, near the 3' end of the coding region, was an exception, for unknown reasons.

One more gene, orf19.4145 / C5\_01500C / *ZCF20*, a predicted zinc finger transcription factor, was identified by two transposon insertions, and is characterized below as a heme-regulated activator of genes for heme uptake and homeostasis. Since *ZCF20* is a generic name based on the predicted zinc finger motif, we propose to rename it *HUF1* (Heme Utilization transcription Factor) based on its function.

## Huf1 promotes sensitivity to heme analogs and hemoglobin-iron utilization

To confirm the *huf1* phenotypes in a standard diploid *C. albicans* strain, we first took advantage of an existing deletion of *HUF1/ZCF20* within a library of transcription factor mutants [32], and found that *huf1<sup>-/-</sup>/zcf20<sup>-/-</sup>* strains are defective in growth at low hemoglobin concentrations compared to the wild-type (Fig. S1). For further experiments, we constructed a new set of *HUF1* deletion strains and reintegrants in the SN148 strain. We tested sensitivity of the mutants to GaPPIX in several ways. First, we replicated the initial screen and grew the wild-type and two independent mutants in shaking cultures with 150  $\mu$ M GaPPIX. Under these conditions, the *huf1<sup>-/-</sup>* deletion strains grew faster than the wild-type (Fig. S2). We then measured the minimal inhibitory concentration (MIC) of GaPPIX as well as of another toxic heme homolog, Co<sup>3+</sup>-protoporphyrin IX (CoPPIX), in 96 well plates. MIC for GaPPIX was increased several-fold in the *huf1<sup>-/-</sup>* mutant strains (Fig. 1A), and the *huf1<sup>-/-</sup>* mutant appeared to be completely resistant to up to 0.2 mM CoPPIX (Fig. 1B). The *huf1<sup>-/-</sup>* mutant was similarly much more resistant to toxic heme analogs in Petri plates (Fig. 1C).

We next tested heme-iron utilization of the *huf1*<sup>-/-</sup> mutant vs. wild-type or reintegrant strains. The mutant exhibited reduced growth on plates containing 1  $\mu$ M hemoglobin as the sole iron source (Fig. 2A). In liquid medium, growth of the mutant strains was reduced at low concentrations but restored at higher concentrations of either hemin or hemoglobin as iron sources (Fig. 2B).

### Huf1 drives hemin-responsive gene expression

The apparent ortholog of *HUF1* in *S. cerevisiae* is *HAP1*, which encodes a heme-regulated transcription factor [33,34]. Based on the proposed consensus binding site of Hap1 (CGGNNNTANCGG [35]), we scanned the intergenic regions of the *C. albicans* genome for this motif, using the Patmatch function of the Candida Genome Database site. We found 13 sites, including one near *FRP2* (pos. -324) and one near *HUF1* itself (pos. -878). The heme oxygenase *HMX1*, an additional candidate Huf1 target gene based on its function, has a near-consensus site at -206.

To test Huf1-dependent expression of these genes in the presence of hemin, a wild-type strain and two *huf1*<sup>-/-</sup> mutant strains were exposed to 50  $\mu$ M hemin and samples were taken for qRT-PCR at 0, 1 h and 2 h after hemin addition. The results shown in Fig. 3 indicate that in the wild-type strain, all three genes (*FRP2*, *HMX1* and *HUF1*) are induced in the presence of hemin. Furthermore, *HMX1* expression is largely dependent upon Huf1 even in the absence of hemin. In contrast, *FRP2* is expressed in the absence of Huf1, but at lower levels than in the wild-type strain. As expected, no *HUF1* expression is detected in the *huf1*<sup>-/-</sup> mutant. However, *HUF1* is itself induced in the presence of hemin in the medium.

### Huf1 regulates heme homeostasis and heme influx into the cell

The effect of Huf1 on expression of *FRP2* suggests that it is involved in heme uptake, whereas its effect on the heme oxygenase *HMX1* suggests that it is involved in cytoplasmic heme homeostasis. To test the influence of Huf1 on cytoplasmic heme levels in the absence and presence of added heme in the medium, we used a recently developed cytoplasmic fluorescent heme sensor (HS1). This sensor is comprised of a green fluorescent protein (GFP) domain into which is embedded a heme-binding cytochrome domain, as well as a red fluorescent domain (mKATE2). Binding of heme to the cytochrome domain causes quenching of the GFP fluorescent signal but not of the mKATE2 signal; hence, the GFP/mKATE2 ratio gives an estimate of cytoplasmic “free” heme levels (or more accurately, “labile” or “exchangeable” heme levels [36,37]), with lower ratios corresponding to higher

heme levels [14,38]. To extend the dynamic range of detection, a second sensor, with lower affinity due to a mutation (M7A) in the cytochrome domain, is also used. A non-binding mutant (DM) serves as control.

We first compared wild-type *HUF1* cells to two independent *huf1*<sup>-/-</sup> mutant strains, each transformed with the three heme sensor plasmids. In the absence of added hemin to the medium, the *huf1*<sup>-/-</sup> strains exhibited somewhat lower fluorescence ratios with both the high-affinity HS1 sensor and the medium-affinity M7A sensor, corresponding to higher heme concentrations in the cytoplasm (Fig. 4A). A similar effect was seen with cells grown in the presence of 2.5  $\mu$ M hemin in the medium: both the high and medium affinity sensors gave somewhat reduced signals in the two *huf1*<sup>-/-</sup> mutant strains vs. the wild-type strain. In 10  $\mu$ M and 50  $\mu$ M hemin, the high-affinity HS1 sensor was saturated in all strains, whereas the medium-affinity M7A sensor gave lower signals in the *huf1*<sup>-/-</sup> strains, indicating higher cytoplasmic heme levels (Fig. 4A).

We hypothesized that the higher heme levels detected in the *huf1*<sup>-/-</sup> strains might be because Huf1 affects the expression of *HMX1*, which encodes a cytoplasmic heme-degrading enzyme (Fig. 3). To test this hypothesis, we deleted *HMX1* in both the *HUF1* wild-type and mutant strains, and compared heme sensor activity in the absence and presence of hemin in the medium. In the absence of hemin, the HS1 sensor gave identical signals in the *HUF1* wild-type and mutant strain, suggesting that the effect of *HUF1* on “baseline” cytoplasmic heme levels is due to its effect on *HMX1* expression (Fig. 4B). We also noted that the HS1 signals were lower in the *hmx1*<sup>-/-</sup> vs. the *HMX1* strains (compare panels A and B of Fig. 4), corresponding to higher cytoplasmic heme levels in the *hmx1*<sup>-/-</sup> cells, as had been described before [14].

In the *hmx1*<sup>-/-</sup> background, upon addition of 5-50  $\mu$ M hemin to the medium, the high-affinity HS1 sensor became saturated in both the *HUF1* and *huf1*<sup>-/-</sup> strains (Fig. 4B). The medium-affinity M7A sensor also became saturated in the *HUF1* strain, but not in the *huf1*<sup>-/-</sup> strain: there, decreasing signals were detected with increasing external hemin, but except for the highest hemin concentration (50  $\mu$ M), the signals were higher in the *huf1*<sup>-/-</sup> strain than in the *HUF1* strain, corresponding to reduced influx of heme into the cell (Fig. 4B).

Taken together, the data indicate that Huf1 affects cytoplasmic heme homeostasis *via* its effect on expression of the heme oxygenase *HMX1*. Once *HMX1* is removed, a second effect

of Huf1 is revealed, on heme influx: in the *huf1*<sup>-/-</sup> mutant, less heme appears in the cytoplasm of cells exposed to hemin in the medium than in the *HUF1* wild-type.

## Huf1 is nuclear localized and stabilized in the presence of hemin

To investigate the regulation of Huf1 by heme, we fluorescently tagged the protein at its C-terminus by integration of GFP into one of the two *HUF1* alleles. Cells expressing Huf1-GFP were grown in iron-limiting medium, which induces *HUF1*/orf19.4145 [39], as well as in the presence of hemin, which was shown here to induce *HUF1* (Fig. 3), and compared to growth in regular medium. Both iron limitation and the presence of hemin in the medium did induce a fluorescent signal that appeared to be nuclear, whereas the signal was barely visible in regular medium (Fig. 5A). Comparison with a nuclear stain confirmed that the GFP signal induced by hemin is indeed concentrated in the nucleus (Fig. S3). Since *HUF1* affects sensitivity to the toxic heme analogs GaPPIX and CoPPIX, we also tested induction of the nuclear Huf1-GFP signal with these and other heme analogs. As shown in Fig. 5B, at identical concentrations, while hemin gave the strongest induction, all heme analogs also induced Huf1-GFP, with Zn<sup>2+</sup>-protoporphyrin IX (ZnPPIX) and CoPPIX giving stronger signals than GaPPIX and Mn<sup>3+</sup>-protoporphyrin IX (MnPPIX).

The induction of the Huf1-GFP signal could be due to induction of *HUF1* transcription, but we surmised that the protein could also be directly affected by the presence of heme. We therefore measured the stability of the protein by placing *HUF1* under the glucose-repressible *MAL2* promoter and measuring protein levels after addition of glucose. As shown in Fig. 5C, while in regular medium, after an initial lag, Huf1 decayed with a half-life of 20-30 min, in the presence of hemin in the medium, it was completely stabilized. Thus, we conclude that stabilization of the Huf1 protein contributes to the increase in Huf1 levels in the presence of hemin in the medium.

## Role of Huf1 in global gene expression in the presence of hemin

To identify the genes activated by Huf1 in the presence of hemin in the medium, *huf1*<sup>-/-</sup> cells transformed either with a vector plasmid or with a plasmid harboring the wild-type *HUF1* gene were exposed to 50 μM hemin in the medium for 30 min, and their global transcriptome was analyzed by RNA-SEQ (Table S1). Expression was compared between *HUF1* and *huf1*<sup>-/-</sup> cells with or without added hemin, and between hemin-supplemented medium and control medium in both types of cells (see Tables S2 and S3 for lists of genes significantly induced or repressed, respectively).



To obtain an overview of the types of genes affected by hemin or by *HUF1*, we performed GO enrichment analysis by biological process on all genes induced or repressed 2x or more in *HUF1* reintegrant vs. *huf1*<sup>-/-</sup> mutant cells with or without added hemin, and in hemin-supplemented vs. regular YPD medium in both types of cells (Supplementary Tables S4, S5). Fig. 6A lists the top GO terms of the Biological Process hierarchy in each comparison. Addition of hemin in the *HUF1* strain caused an increase, among induced genes, in “oxidant detoxification”, consistent with the notion that free heme can cause oxidative damage to membranes and proteins [3], as well as “response to host immune response”, whereas hemin addition caused an increase in “carbohydrate transport” both in the presence and absence of Huf1. Addition of hemin also caused repression of ribosome biogenesis., both in the presence and absence of Huf1.

When comparing *HUF1* and *huf1*<sup>-/-</sup> cells, “cellular iron homeostasis” stands out among induced genes, probably reflecting the heme-uptake genes induced by Huf1, as detailed below. In addition, in *HUF1* vs. *huf1*<sup>-/-</sup> cells in regular medium, rRNA biogenesis also appears among the “induced” genes - i.e., repressed in *huf1*<sup>-/-</sup> -, whereas categories representing ATP generation by glycolysis, carbohydrate transport and responses to toxic chemicals appear among the repressed genes - i.e., induced in *huf1*<sup>-/-</sup>. In the presence of added hemin in the medium, in contrast, most of these GO categories are not overrepresented anymore in *HUF1* vs. *huf1*<sup>-/-</sup> cells.

The overlap between the four subsets of genes induced at least 2x in all four pairwise comparisons was plotted in Fig. 6B. Only seven genes were induced by hemin and were also dependent on Huf1 in all media, including the four genes (CFEM hemophores *RBT5* and *PGA7*, and *FRP1*, *FRP2*) known to be essential for heme acquisition. Three genes that were induced by hemin but that were dependent on Huf1 only in the presence of hemin, contain another CFEM hemophore, *CSA1*. A much larger group of genes (91, or 38.6%) was induced by hemin both in the wild-type and *huf1*<sup>-/-</sup> strains. GO analysis of this group of genes (Fig. 6B; Table S4, +He vs YPD, *HUF1* ∩ *huf1*<sup>-/-</sup>) revealed an enrichment in genes involved in the response to reactive oxygen species, and in carbohydrate transport, as seen also in the GO analysis described in panel A. In summary, hemin induces a response to reactive oxygen species and suppresses ribosome biosynthesis independently of *HUF1*, whereas *HUF1* induces mainly genes of metal homeostasis, specifically of uptake and homeostasis of heme.

To obtain a more detailed view of genes dependent on Huf1, in Table 2 we have listed the genes most expressed (3x or more) in the *HUF1* reintegrant compared to the *huf1*<sup>-/-</sup> deletion

strain, in hemin-supplemented medium. Strikingly, the top of the list is populated by the CFEM hemophores *RBT5*, *PGA7* and *CSA1*, by *FRP1* and *FRP2*, which are ferric reductase-like proteins required for heme uptake, and by the heme oxygenase *HMX1*. In Table 3, we have compared expression of these six genes under all four conditions (in *HUF1* and *huf1*<sup>-/-</sup>, with or without added hemin). What emerges from this comparison is that Huf1 is responsible not only for expression of these genes when hemin is added to the medium, but also for baseline expression in the absence of added hemin in the medium (compare *HUF1* YPD to *huf1*<sup>-/-</sup> YPD). Furthermore, in the absence of *HUF1*, exposure to hemin does not appear to induce these genes.

We next asked whether genes induced or repressed in the *HUF1* vs. the *huf1*<sup>-/-</sup> cells were enriched for the putative Hap1/Huf1 consensus binding site CGGNNNTANCGG [35]. As mentioned above, in the haploid genome, this motif was found at 13 sites in intergenic regions, adjacent to 26 genes (0.4% of the total; Table S6), including *HUF1* itself. Out of 15 genes most induced by Huf1 (3x and more), the motif is found adjacent to 3 genes (20%) ( $p < 0.00003$ ) (Table 2). In contrast, the motif is not found adjacent to any of the 55 genes repressed 2x or more in *HUF1* vs. *huf1*<sup>-/-</sup> cells. When a single mismatch is allowed, the motif is found adjacent to 1678 genes (28%) and in 11 of the 15 most-expressed genes (73%) ( $p < 0.0004$ ) (Table 2). We conclude that the binding motif of Huf1 likely resembles that of Hap1, and that some of the most-highly induced genes are likely to be direct targets of Huf1.

## Role of Huf1 in iron starvation-induced gene expression

The CFEM hemophore genes, as well as *FRP1* and *FRP2*, were previously found to be among the most strongly induced genes under conditions of iron limitation [39,40]. Here however, we have shown that their expression depends upon the heme-regulated Huf1 transcription factor. Thus, to clarify the role of Huf1 in expression of these genes under iron limitation, we measured expression of several of the Huf1 target genes, *RBT5*, *PGA7*, *FRP1* and *FRP2*, as well as *HUF1* itself, under conditions of iron limitation. To impose iron limitation, cells were transferred to medium containing the iron chelator ferrozine, which was previously shown to strongly induce *RBT5* [16].

As shown in Fig. 7A, all genes tested were strongly induced by the shift to ferrozine medium, except *HUF1* itself, which showed only a limited induction at the earliest time-point. Kinetics of induction differed: *FRP2*, in particular, showed its greatest induction at early time points, compared to *RBT5* and *PGA7*, which were gradually induced between the 2 h and the 6 h

time point. Induction was also seen in the *huf1*<sup>-/-</sup> background, however in all genes tested, the extent of induction was reduced in the absence of Huf1, with the strongest effect detected with *FRP2*. In parallel we also followed the induction of the Rbt5 protein by Western blotting, and found that the amount of Rbt5 detectable upon ferrozine induction was reduced in the *huf1*<sup>-/-</sup> strain compared to the *HUF1* strain, confirming a reduced expression of *RBT5* in the *huf1*<sup>-/-</sup> strain at the protein level as well (Fig. 7B). We conclude that while induction of the heme uptake genes by iron starvation does not depend on Huf1, the amplitude of induction was reduced, to different extents in different genes, in its absence.

## DISCUSSION

Organisms respond to their internal and external environment to maintain homeostasis and acquire nutrients. For microorganisms in the animal host, an important environmental factor is iron scarcity, which can be remediated by the acquisition of host heme. Heme, in addition to being itself an essential cellular factor, is also potentially toxic, and its cytoplasmic levels must therefore be closely controlled. We have shown here that *C. albicans* uses a single heme-responsive transcription factor, Huf1, to both maintain cytoplasmic heme homeostasis and activate the utilization of external hemin as heme and iron sources.

The *S. cerevisiae* ortholog of Huf1, Hap1, is bound and activated by heme [34]. However, rather than being involved in heme uptake like Huf1, *S. cerevisiae* Hap1 plays a key role in the regulation of gene expression by oxygen [41,42]. Since heme is central to oxidative metabolism and since heme synthesis requires oxygen, the presence of heme is thought to serve as a barometer for the presence of oxygen in the cell [34,43]. Although Huf1 has diverged in function from Hap1, the two proteins do appear to have a similar consensus binding site (Table 2). In addition, while it is not known whether, like Hap1, Huf1 binds heme directly, two sequences having the consensus Hap1 heme regulatory motif K/R C P V/I [44] are found in the Huf1 sequence at positions 288 and 888. Thus, one likely explanation for the stabilization of Huf1 that we detected when hemin is added to the medium (Fig. 5C) is that it is a consequence of direct binding of heme.

On the assumption that binding of heme stabilizes and activates Huf1, and given that the *HUF1* promoter contains a Hap1/Huf1 consensus binding site, activation of Huf1 by heme would, in a positive feedback loop, activate its own expression as well as expression of its other target genes. Under normal conditions, when heme is endogenously synthesized, excess

heme in the cytoplasm would cause Huf1 to activate the heme oxygenase *HMX1*, which would cause degradation of heme and restoration of homeostasis. Upon exposure of the cell to external heme, an initial influx of heme into the cytoplasm would activate the heme uptake cascade, leading to more heme influx. Our proposed model for the regulation of heme uptake and homeostasis by Huf1 thus consists of a series of interlocked feedback loops (Fig. 8).

Global expression analysis gave insights in the effect of heme overload on the cells, as well as in the specific role of Huf1. GO analysis indicated an activation of genes for oxidant detoxification after exposure to a high concentration of heme, supporting the proposed toxic effect of heme as being due, at least in part, to the generation of reactive oxygen species. An additional general effect of heme exposure was suppression of ribosome biogenesis. This is consistent with previous observations in *S. cerevisiae* that metal stresses as well as other stresses cause suppression of ribosome synthesis genes [45,46]. The oxidant detoxification and suppression of ribosome biogenesis responses that we detected here were not dependent upon Huf1, but could be due to activation of general stress response pathways.

Comparison of gene expression with and without *HUF1* identified a subset of genes involved in cellular iron homeostasis, specifically in heme uptake. Additionally and unexpectedly, in regular medium, the *huf1*<sup>-/-</sup> strain showed reduced rRNA biogenesis, as well as an increase in genes for glycolysis, carbohydrate transport, and response to chemical stress /toxic substance. A possible explanation is that the absence of Huf1 leads to deregulation of heme homeostasis and to higher cellular heme concentrations – as was detected using the HS1 heme sensor (Fig. 4A) – which in turn activates the cellular stress response. The increased carbohydrate transport could be related to the shift to glycolysis. It is not clear why the presence of heme should lead to a shift to glycolysis; one possibility is that by shifting away from cellular oxygen consumption and from generation of ROS by the respiratory chain, the cells could mitigate potential heme-catalyzed oxidative damage.

In contrast to the differences between *HUF1* and *huf1*<sup>-/-</sup> cells in regular medium, much less enrichment in GO categories was detected in *HUF1* vs *huf1*<sup>-/-</sup> cells exposed to 50  $\mu$ M hemin. At such high hemin concentrations, both the wild-type and the mutant cells might experience similar heme overload – compare e.g. cytoplasmic heme in the two types of cells at 50  $\mu$ M hemin in Fig. 4A – , and therefore the general response to high hemin would be unaffected by the absence of *HUF1*.

The CFEM hemophore genes, as well as *FRP1* and *FRP2*, shown here to be regulated by Huf1, had previously been shown to be among the most strongly induced genes under conditions of iron limitation [39,40]. This raised the question whether Huf1 is involved in iron limitation-dependent expression of these genes, in addition to mediating their hemin-induced gene expression. On the one hand, previous data had shown that the iron-responsive transcription factor CBF directly binds the *FRP1* promoter and affects its expression [30]. On the other hand, the screen for GaPPIX-resistant mutants described above was performed under iron-limiting conditions in order to ensure expression of the heme uptake pathway, and nonetheless identified the *HUF1* mutant, suggesting that Huf1 is required even under conditions of gene induction by iron limitation. Furthermore, absence of *HUF1* led to reduced utilization of heme-iron (Fig. 2, Fig. S1), even though these experiments are also performed under iron starvation conditions. When we tested the induction of heme uptake genes in iron limited medium in the *huf1*<sup>-/-</sup> mutant, we found that absence of Huf1 somewhat reduced the amplitude of induction of *RBT5*, *PGA7* and *FRP1*, but strongly reduced the induction of *FRP2*. The effect on *FRP2* explains why *HUF1* was identified in a screen for resistance to GaPPIX, since *FRP2* is essential for full GaPPIX toxicity [22]. However *FRP2* plays a minor role at best in heme-iron utilization in standard medium [22]. Thus, either the partial reduction in expression of *RBT5*, *PGA7* and *FRP1* in the iron-limited *huf1*<sup>-/-</sup> strain is sufficient to explain the reduced heme-iron utilization, or other, unknown genes regulated by Huf1 participate in heme-iron utilization. Regarding the latter possibility, examination of the genes induced in the presence of Huf1 could reveal new factors involved in fungal heme-iron utilization.

The role of Huf1 identified here, to specifically promote uptake of external heme, underscores the importance of host heme as a micronutrient for animal parasites such as *C. albicans*. Furthermore, although external hemin was shown to be able to serve as source for cellular heme in an artificial heme auxotroph [14], the observation that heme uptake genes are activated via Huf1 even in the presence of sufficient iron in the medium, indicates that external hemin, when available, is actually a preferred heme source for this organism. Given the complexity of heme synthesis [47], this strategy makes metabolic sense, and may turn out to be more widespread than previously thought. External heme uptake must be complemented by a system for transporting the acquired heme from the endocytic system to the different cellular locations where it is required. Our knowledge of intracellular transport mechanisms of externally acquired heme – or, for that matter, of endogenously synthesized heme – is very

limited [1,36,48]. Existence of a dedicated uptake system of external heme in *C. albicans* makes it a pertinent organism to probe these questions.

## METHODS

### *Media and chemicals*

Cells were grown in YPD medium (1% yeast extract, 2% bacto-peptone, 2% glucose, tryptophan 150 mg/l) or in Synthetic Complete (SC) medium lacking specific amino acids, as indicated. SC medium contains, per liter, Yeast Nitrogen Base (USBiological) 1.7 g, (NH<sub>4</sub>)<sub>2</sub>SO<sub>4</sub> 5 g, the 20 amino acids, adenine and uridine, 0.1 g each except leucine, 0.2 g, glucose 20 g, and 0.2 mM inositol. YPD pH 7.5 was made by adding 0.1 M Tris-Cl pH 7.5 from a 1M stock. RPMI-transferrin was prepared as described previously [16] with the following modifications: RPMI-1640 HEPES (Sigma) was supplemented with 2% glucose, 25 µg/ml uridine and 25 µg/ml adenine, then the medium was desferrated by 5% w/v Chelex100 (Sigma) for 2 hours and 100µg/ml human serum iron chelator apotransferrin (Sigma) was added. Chelex100 beads were removed by filtration and essential metals except iron were restored (40 µg/L CuSO<sub>4</sub>, 400 µg/L ZnSO<sub>4</sub>, 400 µg/L MnCl<sub>2</sub>, 200 µg/L MoNa<sub>2</sub> and 200 mg/L CaCl<sub>2</sub>). The final pH was adjusted to 7.2 with 1N HCl, and only medium prepared the same day was used. Media were supplemented with the ion chelators ferrozine or bathophenanthroline sulfonate (BPS) (Sigma) at 1 mM, hemin as indicated from a 2 mM stock in 50 mM NaOH, or bovine hemoglobin from a 0.5 mM stock in phosphate-buffered saline (Dulbecco's PBS; Biological Industries, Israel). Hemin, Ga<sup>3+</sup>-protoporphyrin IX and Co<sup>3+</sup>-protoporphyrin IX were obtained from Frontier Scientific, and bovine hemoglobin from Sigma (H2500). Ga<sup>3+</sup>-protoporphyrin IX and Co<sup>3+</sup>-protoporphyrin IX were added from a 50 mM stock made fresh in DMSO.

### *Strains and plasmids*

*C. albicans* strains are listed in Table 4. KC1368 is CAI4 transformed with plasmid KB2753. KC1399 is SN148 transformed with plasmid KB2759. KC1406 was built by sequential deletion of both *HUF1* alleles by homologous recombination with fusion PCR products containing the *NATr* gene and the *CdLEU2* gene, respectively, each with 500 bp of upstream and downstream *HUF1* sequences (Table S7, primers 11-14), according to published protocol [49]. KC1407 is KC1406 transformed with plasmid KB2761, and KC1408 is KC1406



transformed with BES116 [50]. KC1426 is KC1406 with both alleles of *HMX1* substituted with the *LEU2* marker, using homologous recombination as above, combined with transient CRISPR as described [14,51].

Plasmid KB2753 contains the 3' end of *HUF1*(+1258 to +3255; primers 15, 16) SpeI – XhoI, cloned into KB2430 digested with the same enzymes, fusing the *HUF1* ORF to GFP. The plasmid is digested with BglIII for integration at the chromosomal locus of *HUF1*. KB2430 is the CaGFPgamma and URA3 XhoI-KpnI fragment from pFA-GFP-URA3 [52] cloned into pBSIISK+. KB2759 was constructed by substituting the PstI-HindIII *GCN4* open reading frame fragment of plasmid KB1575 [53] with the *HUF1* open reading frame (primers 7, 8). KB2761 contains the *HUF1* gene fragment extending (-1890) to (+3636), SpeI and HindIII into BES116 (primers 9, 10).

### *Transposon insertion identification*

Single colonies were grown overnight in YPD medium, DNA was extracted as described [54], and subjected to the FPN1 DNA amplification protocol [55] using Ds-specific primers (Table S7, primers 1-6) as described [25]. PCR reactions were tested for the presence of bands on an agarose gel and the positive reaction (>90%) were cleaned using the GenElute kit (Sigma-Aldrich) and sequenced by Sanger sequencing. The sequence was used to determine the position and orientation of the Ds insertion in the *C. albicans* genome.

### *Growth assays*

For hemoglobin utilization, overnight cultures grown in YPD were diluted in the morning into a series of two-fold dilutions of hemoglobin in YPD + ferrozine or BPS. Cells were inoculated in flat-bottomed 96-well plates at OD<sub>600</sub>=0.00001, 150 µl per well. Plates were incubated at 30°C on an orbital shaker at 60 rpm and growth was measured by optical density (OD<sub>600</sub>) after 2 and 3 days with an ELISA reader. Cells were resuspended with a multi-pipettor before each reading. Each culture was done in triplicate. For MPP sensitivity, cells were inoculated in flat-bottomed 96-well plates in YPD + 1 mM ferrozine at OD<sub>600</sub>=0.0001, 150 µl per well. Plates were incubated at 30°C on an orbital shaker at 60 rpm and growth was measured by optical density (OD<sub>600</sub>) after 2 days with an ELISA reader.

### *Heme sensor binding assays*

The protocol was as described [14]. Briefly, each strain to be tested was transformed with the sensor plasmids KB2636 (WT HS1), KB2669 (M7A), KB2671 (DM), as well as a vector

plasmid. Overnight cultures were diluted to O.D.<sub>600</sub> = 0.2 and grown for 4h in the indicated hemin concentrations. For fluorescence measurements, cells were pelleted, washed once with PBS, resuspended to O.D.<sub>600</sub> = 5, and 0.2 ml were placed in duplicate in a black 96 well flat bottom plates (Nunc Fluorotrac). Fluorescence was measured with a Tecan infinite 200 Pro reader, with eGFP: ex. 480 nm (9 nm bandwidth), em. 520 nm (20 nm bandwidth), and mKATE2: ex. 588 nm (9 nm bandwidth), em. 620 nm (20 nm bandwidth). Each strain was represented by three independent cultures, and each culture was measured twice (technical duplicate), the vector-only culture reading was subtracted from all other readings, and the ratio of eGFP to mKATE2 was calculated.

### *Glucose chase and Western blotting*

For glucose chase of Huf1-6xMyc, cells were grown overnight in YEP + 2% raffinose at 30°C, and diluted in the morning to OD<sub>600</sub> = 0.5, grown for 3 hours in YEP + 2% maltose for induction, with 20 μM hemin or without hemin, then 2% glucose was added and 1 ml aliquots were taken at 0', 30', 60' and 90'. Samples were then prepared as described [56]. Briefly, aliquots were treated with 0.25 N NaOH, 1% 2-mercaptoethanol, TCA-precipitated, washed in acetone and resuspended in protein loading buffer, then separated by SDS-PAGE and Western blotting. The blots were reacted with the 9E10 anti-Myc monoclonal antibody, and with monoclonal anti-tubulin (DM1A, Sigma) as internal control, and the bands were visualized by ECL and quantitated using an ImageQuant LAS4010 apparatus. For detection of Rbt5, a previously described rabbit polyclonal antiserum [16] was used, and C4 anti-actin monoclonal antibody (MP Biomedicals) as internal control, and quantitated as above.

### *Microscopy*

Cells were imaged with a Zeiss Axioskop Imager epifluorescence microscope equipped with DIC optics, using a 100X objective. For visualizing Huf1-GFP, the GFP filter set was used with an exposure time of 6 seconds. For quantitation of subcellular localization, at least 100 cells were scored for each datapoint and each cell was given a score between 0-3 for each location. The scoring was done blind, on pictures taken by a different operator and given an arbitrary coding.

*CMAC vacuolar stain:* CMAC was added to a logarithmically growing culture to 5 μM final from a 10 mM stock solution in DMSO and the cells were incubated a further 30 minutes at 30°C prior to microscopy visualization. For visualizing CMAC by epifluorescence microscopy, the DAPI filter was used with an exposure time of 700 ms.



*Hoechst 33342 nuclear stain:* Hoechst 33342 was added to a logarithmically growing culture to 10 µg/ml from a 1 mg/ml stock in water and the cells were incubated a further 30 minutes at 30°C prior to microscopy visualization. For visualizing Hoechst 33342 by epifluorescence microscopy, the DAPI filter was used with an exposure time of 1 second.

#### *RNA extraction and analysis*

For RT-PCR, for each sample 10 ml of culture was spun down and the pellet was frozen in liquid nitrogen and stored at -80 °C. The pellet was re-suspended in 400 µl lysis buffer (10 mM Tris-HCl pH 7.5, 10 mM EDTA, 0.5% SDS), and 400 µl acidic phenol, vortexed and incubated at 65 °C for 1 hour with occasional vortexing (“hot phenol” method [57]). The tubes were then placed on ice for 10 min and then centrifuged for 10 min at 4 °C, max speed. The upper layer was removed to a new tube, re-extracted with equal volume of phenol-chloroform 1:5 and vortexed. The tubes were centrifuged again for 10 min and the upper layer was removed into new tube, re-extracted with equal volume of chloroform and vortexed. The tubes were centrifuged again for 10 min and the upper layer was removed into new tube, for ethanol precipitation. Next, samples were treated with DNase to remove contaminating DNA from RNA using TURBO DNA-free Kit according to the manufacturer's instructions, followed by cDNA synthesis from 1000 ng of RNA, according to the Applied Biosystems™ High-Capacity RNA-to-cDNA™ Kit in total 20 µl reaction. RT-PCR (primers 15-28) was performed using QuantStudio™ 3 Real-Time PCR System equipment with Fast SYBR™ Green Master Mix in a final volume 10 µl. Expression in each sample was normalized to ACT1 expression.

For RNA-SEQ, mutant and reintegrant cells were grown overnight in YPD, diluted in the morning in YPD to OD<sub>600</sub> = 0.5. After 2.5 h at 30°, the cultures were split in two and 50 µM hemin was added from a 2 mM stock, and samples were taken after 30'. RNA was extracted using the “hot phenol” method [57]. Library construction and analysis was performed at the BCF Technion Genomics Center with NEBNext Ultra II Directional RNA Library Prep Kit for Illumina, cat no. E7760, using 800ng total RNA as a starting material. mRNAs pull-down was performed using the Magnetic Isolation Module (NEB, cat no. E7490). After construction, the concentration of each library was measured using Qubit (Invitrogen) and the size was determined using the TapeStation 4200 with the High Sensitivity D1000 kit (cat no. 5067-5584). All libraries were mixed into a single tube with equal molarity. The RNAseq data was generated on Illumina NextSeq2000, using P2 100 cycles (Read1-100; Index1-8; Index2-8) (Illumina, cat no. 20046811). Quality control was assessed using Fastqc (v0.11.8),

reads were trimmed for adapters, low quality 3' and minimum length of 20 using CUTADAPT (v1.10). 100 bp single reads were aligned to a *Candida albicans* reference genome (GCF\_000182965.3\_ASM18296v3\_genomic.fna from NCBI) using Tophat (v2.1.0, uses Bowtie2 version 2.2.6). Between  $26 \times 10^6$  and  $31 \times 10^6$  uniquely mapped reads (~96% of total reads) were obtained per sample. The number of reads per gene was counted using HTSeq-count (v2.2.0). A statistical analysis was performed using DESeq2 R package (v1.28.0) [58]. The number of reads per gene was extracted into merged\_counts.csv and normalized\_counts.csv files for raw counts and normalized counts, respectively. The similarity between samples was evaluated within DESeq2 package using correlation matrix, shown in two plots- heatmap and principal component analysis (PCA). Raw data are available at NCBI's GEO database under accession number GSE202577.

GO analysis on "Biological Process" was carried out using PANTHER [59] (<http://geneontology.org/>), but using the list of 5921 protein-coding genes detected in our experiment as reference, rather than the total list of genes. Intersects between lists were calculated and Venn diagrams were drawn with Venny 2.1 (<https://bioinfogp.cnb.csic.es/tools/venny/index.html>).

## ACKNOWLEDGEMENTS

We thank Liat Linde and Maor Hatoel (Biomedical Core Facility Genomics Center, Technion - B. Rappaport Faculty of Medicine) for carrying out RNA-seq analysis, and Sar Selig for critical reading of the manuscript. This study was supported by ISF grant 587/19 to DK.

## AUTHOR CONTRIBUTIONS

N.A., Z.W. and D.K. designed the experiments and analyzed the data. N.A., Z.W., M.P., and S.M. performed the experiments. J.B. provided reagents. N.A. and D.K. wrote the paper.

## REFERENCES

1. Reddi AR, Hamza I. Heme Mobilization in Animals: A Metalloprotein's Journey. *Acc Chem Res.* 2016;49: 1104–1110. doi:10.1021/acs.accounts.5b00553
2. Ortiz de Montellano PR, Begley TP. Hemes in Biology. *Wiley Encyclopedia of Chemical Biology.* John Wiley & Sons, Inc.; 2007. doi:10.1002/9780470048672.wecb221
3. Kumar S, Bandyopadhyay U. Free heme toxicity and its detoxification systems in human. *Toxicol Lett.* 2005/05/27. 2005;157: 175–188. doi:10.1016/j.toxlet.2005.03.004
4. Sassa S. Why heme needs to be degraded to iron, biliverdin IXalpha, and carbon monoxide? *Antioxid Redox Signal.* 2004;6: 819–824. doi:10.1089/ars.2004.6.819
5. Ponka P. Cell Biology of Heme. *Am J Med Sci.* 1999;318: 241–256. doi:https://doi.org/10.1016/S0002-9629(15)40628-7
6. Anzaldi LL, Skaar EP. Overcoming the heme paradox: heme toxicity and tolerance in bacterial pathogens. *Infect Immun. American Society for Microbiology Journals;* 2010;78: 4977–89. doi:10.1128/IAI.00613-10
7. Rao AU, Carta LK, Lesuisse E, Hamza I. Lack of heme synthesis in a free-living eukaryote. *Proc Natl Acad Sci U S A.* 2005;102: 4270–4275. doi:10.1073/pnas.0500877102
8. Ponka P, Sheftel AD, English AM, Scott Bohle D, Garcia-Santos D. Do Mammalian Cells Really Need to Export and Import Heme? *Trends Biochem Sci.* 2017;42: 395–406. doi:10.1016/j.tibs.2017.01.006
9. Weinberg ED. Nutritional Immunity. *JAMA. American Medical Association;* 1975;231: 39. doi:10.1001/jama.1975.03240130021018
10. Andrews NC. Iron homeostasis: insights from genetics and animal models. *Nat Rev Genet.* 2001/03/17. 2000;1: 208–217. doi:10.1038/35042073
11. Kornitzer D, Roy U. Pathways of heme utilization in fungi. *Biochim Biophys Acta - Mol Cell Res. Elsevier;* 2020;1867: 118817. doi:10.1016/J.BBAMCR.2020.118817
12. Bairwa G, Hee Jung W, Kronstad JW. Iron acquisition in fungal pathogens of humans. *Metallomics.* 2017;9: 215–227. doi:10.1039/c6mt00301j
13. Cassat JE, Skaar EP. Iron in infection and immunity. *Cell Host Microbe.* 2013;13: 509–519. doi:10.1016/j.chom.2013.04.010
14. Weissman Z, Pinsky M, Donegan RK, Reddi AR, Kornitzer D. Using genetically encoded heme sensors to probe the mechanisms of heme uptake and homeostasis in

- Candida albicans. Cell Microbiol. 2021;23: e13282. doi:10.1111/cmi.13282
15. Moors MA, Stull TL, Blank KJ, Buckley HR, Mosser DM. A Role for Complement Receptor-like Molecules in Iron Acquisition by Candida albicans. J Exp Med. J Exp Med; 1992;175: 1643–1651. doi:10.1084/jem.175.6.1643
16. Weissman Z, Kornitzer D. A family of Candida cell surface haem-binding proteins involved in haemin and haemoglobin-iron utilization. Mol Microbiol. 2004;53: 1209–1220. doi:10.1111/j.1365-2958.2004.04199.x
17. Weissman Z, Shemer R, Conibear E, Kornitzer D. An endocytic mechanism for haemoglobin-iron acquisition in *Candida albicans*. Mol Microbiol. Blackwell Publishing Ltd; 2008;69: 201–217. doi:10.1111/j.1365-2958.2008.06277.x
18. Kuznets G, Vigonsky E, Weissman Z, Lalli D, Gildor T, Kauffman SJ, et al. A Relay Network of Extracellular Heme-Binding Proteins Drives C. albicans Iron Acquisition from Hemoglobin. PLoS Pathog. 2014;10: e1004407. doi:10.1371/journal.ppat.1004407
19. Nasser L, Weissman Z, Pinsky M, Amartely H, Dvir H, Kornitzer D. Structural basis of haem-iron acquisition by fungal pathogens. Nat Microbiol. 2016;1: 16156. doi:10.1038/nmicrobiol.2016.156
20. Amorim-Vaz S, Tran Vdu T, Pradervand S, Pagni M, Coste AT, Sanglard D. RNA Enrichment Method for Quantitative Transcriptional Analysis of Pathogens In Vivo Applied to the Fungus Candida albicans. MBio. 2015;6: e00942-15. doi:10.1128/mBio.00942-15
21. Mochon AB, Jin Y, Kayala MA, Wingard JR, Clancy CJ, Nguyen MH, et al. Serological profiling of a Candida albicans protein microarray reveals permanent host-pathogen interplay and stage-specific responses during candidemia. PLOS Pathog. 2010/04/03. 2010;6: e1000827. doi:10.1371/journal.ppat.1000827
22. Roy U, Yaish S, Weissman Z, Pinsky M, Dey S, Horev G, et al. Ferric reductase-related proteins mediate fungal heme acquisition. bioRxiv. Cold Spring Harbor Laboratory; 2022; 2022.05.25.493415. doi:10.1101/2022.05.25.493415
23. Hickman MA, Zeng G, Forche A, Hirakawa MP, Abbey D, Harrison BD, et al. The “obligate diploid” Candida albicans forms mating-competent haploids. Nature. Nature Publishing Group; 2013;494: 55–59. doi:10.1038/nature11865
24. Shtifman Segal E, Gritsenko V, Levitan A, Yadav B, Dror N, Steenwyk JL, et al. Gene Essentiality Analyzed by In Vivo Transposon Mutagenesis and Machine Learning in a Stable Haploid Isolate of Candida albicans. MBio. 2018;9: e02048-18.

- doi:<https://doi.org/10.1128/mBio.02048-18>
25. Mielich K, Shtifman-Segal E, Golz JC, Zeng G, Wang Y, Berman J, et al. Maize transposable elements Ac/Ds as insertion mutagenesis tools in *Candida albicans*. *G3 Genes, Genomes, Genet.* Genetics Society of America; 2018;8: 1139–1145. doi:10.1534/g3.117.300388
  26. Gao J, Wang H, Li Z, Wong AH-H, Wang Y-Z, Guo Y, et al. *Candida albicans* gains azole resistance by altering sphingolipid composition. *Nat Commun.* 2018;9: 4495. doi:10.1038/s41467-018-06944-1
  27. Hijazi S, Visca P, Frangipani E. Gallium-Protoporphyrin IX Inhibits *Pseudomonas aeruginosa* Growth by Targeting Cytochromes. *Front Cell Infect Microbiol.* Frontiers; 2017;7: 12. doi:10.3389/fcimb.2017.00012
  28. Bairwa G, Caza M, Horianopoulos L, Hu G, Kronstad J. Role of clathrin-mediated endocytosis in the use of heme and hemoglobin by the fungal pathogen *Cryptococcus neoformans*. *Cell Microbiol.* John Wiley & Sons, Ltd (10.1111); 2019;21: e12961. doi:10.1111/cmi.12961
  29. Davis D. Adaptation to environmental pH in *Candida albicans* and its relation to pathogenesis. *Curr Genet.* 2003;44: 1–7. doi:10.1007/s00294-003-0415-2
  30. Baek YU, Li M, Davis DA. *Candida albicans* ferric reductases are differentially regulated in response to distinct forms of iron limitation by the Rim101 and CBF transcription factors. *Eukaryot Cell.* 2008/05/27. 2008;7: 1168–1179. doi:EC.00108-08 [pii]10.1128/EC.00108-08
  31. Liang Y, Gui L, Wei D-S, Zheng W, Xing L-J, Li M-C. *Candida albicans* ferric reductase *FRP1* is regulated by direct interaction with Rim101p transcription factor. *FEMS Yeast Res.* Blackwell Publishing Ltd; 2009;9: 270–277. doi:10.1111/j.1567-1364.2008.00468.x
  32. Homann OR, Dea J, Noble SM, Johnson AD. A phenotypic profile of the *Candida albicans* regulatory network. *PLoS Genet.* 2009;5: e1000783. doi:10.1371/journal.pgen.1000783
  33. Pfeifer K, Kim KS, Kogan S, Guarente L. Functional dissection and sequence of yeast HAP1 activator. *Cell.* 1989;56: 291–301. doi:10.1016/0092-8674(89)90903-3
  34. Zhang L, Hach A. Molecular mechanism of heme signaling in yeast: the transcriptional activator Hap1 serves as the key mediator. *Cell Mol Life Sci C* 1999 565. Springer; 1999;56: 415–426. doi:10.1007/S000180050442
  35. Gordân R, Murphy KF, McCord RP, Zhu C, Vedenko A, Bulyk ML. Curated

- collection of yeast transcription factor DNA binding specificity data reveals novel structural and gene regulatory insights. *Genome Biol. BioMed Central*; 2011;12: 1–18. doi:10.1186/GB-2011-12-12-R125/FIGURES/6
36. Gallio AE, Fung SS-P, Cammack-Najera A, Hudson AJ, Raven EL. Understanding the Logistics for the Distribution of Heme in Cells. *JACS Au*. 2021;1: 1541–1555. doi:10.1021/jacsau.1c00288
37. Hanna DA, Martinez-Guzman O, Reddi AR. Heme Gazing: Illuminating Eukaryotic Heme Trafficking, Dynamics, and Signaling with Fluorescent Heme Sensors. *Biochemistry*. 2017;56: 1815–1823. doi:10.1021/acs.biochem.7b00007
38. Hanna DA, Harvey RM, Martinez-Guzman O, Yuan X, Chandrasekharan B, Raju G, et al. Heme dynamics and trafficking factors revealed by genetically encoded fluorescent heme sensors. *Proc Natl Acad Sci U S A*. 2016;113: 7539–7544. doi:10.1073/pnas.1523802113
39. Chen C, Pande K, French SD, Tuch BB, Noble SM. An iron homeostasis regulatory circuit with reciprocal roles in *Candida albicans* commensalism and pathogenesis. *Cell Host Microbe*. 2011/08/17. 2011;10: 118–135. doi:10.1016/j.chom.2011.07.005
40. Lan CY, Rodarte G, Murillo LA, Jones T, Davis RW, Dungan J, et al. Regulatory networks affected by iron availability in *Candida albicans*. *Mol Microbiol*. 2004/09/25. 2004;53: 1451–1469. doi:10.1111/j.1365-2958.2004.04214.xMMI4214 [pii]
41. Creusot F, Verdière J, Gaisne M, Slonimski PP. CYP1 (HAP1) regulator of oxygen-dependent gene expression in yeast: I. Overall organization of the protein sequence displays several novel structural domains. *J Mol Biol. Academic Press*; 1988;204: 263–276. doi:10.1016/0022-2836(88)90574-8
42. Kwast KE, Burke P V., Poyton RO. Oxygen sensing and the transcriptional regulation of oxygen-responsive genes in yeast. *J Exp Biol. The Company of Biologists*; 1998;201: 1177–1195. doi:10.1242/JEB.201.8.1177
43. Zitomer RS, Lowry C V. Regulation of gene expression by oxygen in *Saccharomyces cerevisiae*. *Microbiol Rev. American Society for Microbiology*; 1992;56: 1–11. doi:10.1128/MR.56.1.1-11.1992
44. Lee HC, Hon T, Lan C, Zhang L. Structural Environment Dictates the Biological Significance of Heme-Responsive Motifs and the Role of Hsp90 in the Activation of the Heme Activator Protein Hap1. *Mol Cell Biol. American Society for Microbiology*; 2003;23: 5857–5866. doi:10.1128/MCB.23.16.5857-5866.2003/ASSET/FD183A75-C492-497F-B886-8B7EDA65AD6E/ASSETS/GRAPHIC/MB1630225007.JPEG

45. Hosiner D, Gerber S, Lichtenberg-Fraté H, Glaser W, Schüller C, Klipp E. Impact of Acute Metal Stress in *Saccharomyces cerevisiae*. PLoS One. Public Library of Science; 2014;9: e83330. doi:10.1371/JOURNAL.PONE.0083330
46. Albert B, Tomassetti S, Gloor Y, Dilg D, Mattarocci S, Kubik S, et al. Sfp1 regulates transcriptional networks driving cell growth and division through multiple promoter-binding modes. Genes Dev. Cold Spring Harbor Laboratory Press; 2019;33: 288–293. doi:10.1101/GAD.322040.118/-/DC1
47. Layer G, Reichelt J, Jahn D, Heinz DW. Structure and function of enzymes in heme biosynthesis. Protein Sci. John Wiley & Sons, Ltd; 2010;19: 1137–1161. doi:10.1002/PRO.405
48. Hamza I, Dailey HA. One ring to rule them all: trafficking of heme and heme synthesis intermediates in the metazoans. Biochim Biophys Acta. 2012;1823: 1617–1632. doi:10.1016/j.bbamcr.2012.04.009
49. Noble SM, Johnson AD. Strains and strategies for large-scale gene deletion studies of the diploid human fungal pathogen *Candida albicans*. Eukaryot Cell. 2005;4: 298–309. Available: [http://www.ncbi.nlm.nih.gov/entrez/query.fcgi?cmd=Retrieve&db=PubMed&dopt=Citation&list\\_uids=15701792](http://www.ncbi.nlm.nih.gov/entrez/query.fcgi?cmd=Retrieve&db=PubMed&dopt=Citation&list_uids=15701792)
50. Feng Q, Summers E, Guo B, Fink G. Ras signaling is required for serum-induced hyphal differentiation in *Candida albicans*. J Bacteriol. 1999;181: 6339–6346. Available: [http://www.ncbi.nlm.nih.gov/entrez/query.fcgi?cmd=Retrieve&db=PubMed&dopt=Citation&list\\_uids=10515923](http://www.ncbi.nlm.nih.gov/entrez/query.fcgi?cmd=Retrieve&db=PubMed&dopt=Citation&list_uids=10515923)
51. Min K, Ichikawa Y, Woolford CA, Mitchell AP. *Candida albicans* Gene Deletion with a Transient CRISPR-Cas9 System. mSphere. American Society for Microbiology; 2016;1. doi:10.1128/msphere.00130-16
52. Zhang C, Konopka JB. A photostable green fluorescent protein variant for analysis of protein localization in *Candida albicans*. Eukaryot Cell. 2010;9: 224–226. doi:10.1128/EC.00327-09
53. Gildor T, Shemer R, Atir-Lande A, Kornitzer D. Coevolution of cyclin Pcl5 and its substrate Gen4. Eukaryot Cell. 2005;4: 310–318. doi:10.1128/EC.4.2.310-318.2005
54. Hoffman CS, Winston F. A ten-minute DNA preparation from yeast efficiently releases autonomous plasmids for transformation of *Escherichia coli*. Gene. Elsevier; 1987;57: 267–272. doi:10.1016/0378-1119(87)90131-4



55. Wang Z, Ye S, Li J, Zheng B, Bao M, Ning G. Fusion primer and nested integrated PCR (FPNI-PCR): a new high-efficiency strategy for rapid chromosome walking or flanking sequence cloning. BMC Biotechnol. BMC Biotechnol; 2011;11.  
doi:10.1186/1472-6750-11-109
56. Kornitzer D. Monitoring protein degradation. Methods in Enzymology. 2002.  
doi:10.1016/S0076-6879(02)51874-7
57. Collart MA, Oliviero S. Preparation of yeast RNA. Curr Protoc Mol Biol. 2008/02/12. 2001;Chapter 13: Unit13 12. doi:10.1002/0471142727.mb1312s23
58. Love MI, Huber W, Anders S. Moderated estimation of fold change and dispersion for RNA-seq data with DESeq2. Genome Biol. Genome Biol; 2014;15.  
doi:10.1186/S13059-014-0550-8
59. Mi H, Ebert D, Muruganujan A, Mills C, Albu LP, Mushayamaha T, et al. PANTHER version 16: a revised family classification, tree-based classification tool, enhancer regions and extensive API. Nucleic Acids Res. Oxford Academic; 2021;49: D394–D403. doi:10.1093/NAR/GKAA1106
60. Fonzi WA, Irwin MY. Isogenic strain construction and gene mapping in *Candida albicans*. Genetics. 1993;134: 717–728.



**Table 1. Transposon insertion sites**

List of genes with transposon insertion displaying reduced Hb utilization.

| Gene              | # of occurrences (# of independent insertion sites) |
|-------------------|-----------------------------------------------------|
| RIM8              | 7 (6)                                               |
| RIM9              | 4 (3)                                               |
| RIM13             | 6 (5)                                               |
| RIM20             | 14 (12)                                             |
| RIM21             | 20 (13)                                             |
| orf19.2914/RIM23  | 5 (4)                                               |
| RIM101            | 2 (2) (both in promoter)                            |
| DFG16             | 4 (3)                                               |
| VPS23             | 1                                                   |
| VPS25             | 1                                                   |
| VPS36             | 2 (2)                                               |
| <b>HUF1/ZCF20</b> | <b>2 (2)</b>                                        |
| Orf19.5918        | 1                                                   |
| Orf19.1813/FLC2   | 1                                                   |
| Orf19.703/CPD1    | 1                                                   |
| RTG3              | 1                                                   |
| MRP2              | 1                                                   |
| MSH6              | 1                                                   |
| FRP2              | 1                                                   |

**Table 2.** Genes expressed 3-fold or more in *HUF1* reintegrant (KC1407) vs. *huf1*<sup>-/-</sup> cells (KC1408) exposed for 30 min to 50  $\mu$ M hemin.

| orf19.     | Gene  | Fold change,<br><i>HUF1</i> vs. <i>huf1</i> <sup>-/-</sup> | CGGNNNTANCGG | CGGNNNTANCGG<br>(1 mismatch allowed) |
|------------|-------|------------------------------------------------------------|--------------|--------------------------------------|
| orf19.5636 | RBT5  | 357                                                        |              | +                                    |
| orf19.5634 | FRP1  | 178                                                        |              | +                                    |
| orf19.5635 | PGA7  | 35                                                         |              | +                                    |
| orf19.6073 | HMX1  | 14                                                         |              | +                                    |
| orf19.7112 | FRP2  | 12                                                         | +            | ++                                   |
| orf19.2449 |       | 6.7                                                        |              |                                      |
| orf19.4270 | MNN13 | 6.1                                                        |              | +                                    |
| orf19.7114 | CSA1  | 5.7                                                        | +            | ++                                   |
| orf19.1783 | YOR1  | 4.6                                                        |              | +                                    |
| orf19.5677 | DUR4  | 3.9                                                        |              |                                      |
| orf19.1438 |       | 3.7                                                        |              | +                                    |
| orf19.8278 |       | 3.6                                                        |              | +                                    |
| orf19.7148 | TPO2  | 3.6                                                        | +            | ++                                   |
| orf19.4377 | KRE1  | 3.5                                                        |              |                                      |
| orf19.6229 | CAT1  | 3                                                          |              |                                      |

**Table 3.** Expression of six Huf1-dependent genes involved in heme uptake and homeostasis. For each gene, expression (normalized counts of the RNA-SEQ readings) was normalized to expression in the wild-type strain in YPD. Each result is the average of three biological replicates, with standard deviations indicated.

|      | <i>HUF1</i> YPD | <i>HUF1</i> +He | <i>huf1</i> <sup>-/-</sup> YPD | <i>huf1</i> <sup>-/-</sup> +He |
|------|-----------------|-----------------|--------------------------------|--------------------------------|
| RBT5 | 1 ± 0.19        | 7.8 ± 1.7       | 0.041 ± 0.001                  | 0.022 ± 0.001                  |
| PGA7 | 1 ± 0.16        | 4.3 ± 1.0       | 0.16 ± 0.01                    | 0.12 ± 0.01                    |
| CSA1 | 1 ± 0.22        | 3.7 ± 0.8       | 0.86 ± 0.06                    | 0.64 ± 0.07                    |
| FRP1 | 1 ± 0.25        | 3.8 ± 0.8       | 0.067 ± 0.06                   | 0.021 ± 0.003                  |
| FRP2 | 1 ± 0.28        | 3.0 ± 0.4       | 0.14 ± 0.01                    | 0.24 ± 0.01                    |
| HMX1 | 1 ± 0.20        | 1.5 ± 0.1       | 0.010 ± 0.04                   | 0.10 ± 0.01                    |

**Table 4.** List of *Candida albicans* strains.

| Name   | Genotype                                                                         | Origin    |
|--------|----------------------------------------------------------------------------------|-----------|
| SN148  | <i>ura3Δ::imm434/ura3Δ::imm434 his1Δ/his1Δ</i><br><i>arg4Δ/arg4Δ leu2Δ/leu2Δ</i> | [49]      |
| CAI4   | <i>ura3Δ::imm434/ura3Δ::imm434</i>                                               | [60]      |
| KC108  | CAI4 <i>rbt5::hisG/rbt5::hisG</i>                                                | [16]      |
| KC1251 | SN148 <i>hmx1Δ::LEU2/hmx1Δ::LEU2</i>                                             | [14]      |
| KC1266 | SN148 <i>LEU2/leu2Δ ADE2/ade2::URA3</i>                                          | This work |
| KC1330 | SN148 <i>ura3Δ::imm434/URA3</i><br><i>huf1Δ::HIS1/huf1Δ::LEU2</i>                | [32]      |
| KC1368 | CAI4 <i>HUF1/HUF1-GFP URA3</i>                                                   | This work |
| KC1399 | SN148 <i>ADE2/ade2::MAL2-HUF1-6xMyc URA3</i>                                     | This work |
| KC1406 | SN148 <i>huf1Δ::NAT/huf1Δ::LEU2</i>                                              | This work |
| KC1407 | KC1406 <i>ADE2/ade2::HUF1 URA3</i>                                               | This work |
| KC1408 | KC1406 <i>ADE2/ade2::URA3</i>                                                    | This work |
| KC1426 | KC1406 <i>hmx1Δ::HIS1/hmx1Δ::HIS1</i>                                            | This work |

## Figures

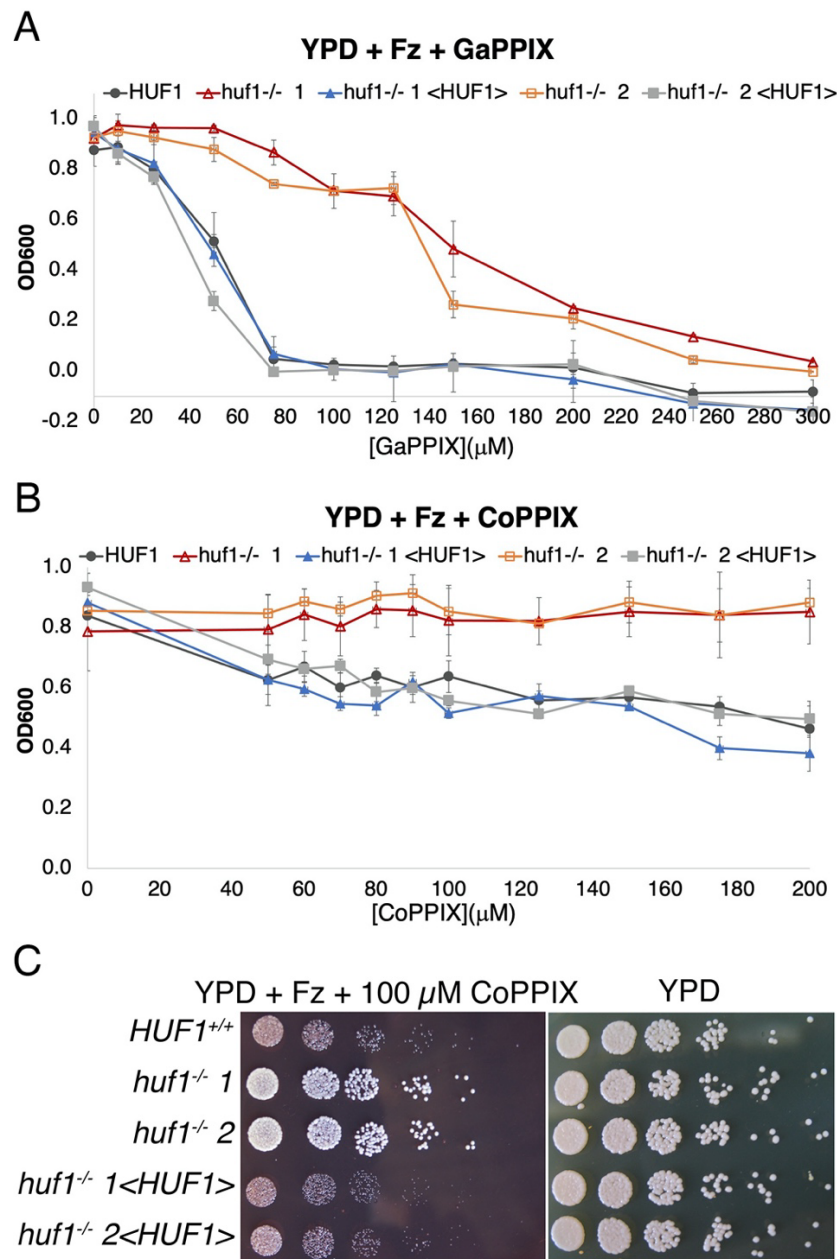

**Fig. 1.** The *huf1*<sup>-/-</sup> mutant is resistant to the heme analogs GaPPIX and CoPPIX. **A.** GaPPIX MIC (minimal inhibitory concentration) assay of the wild-type (KC1266), two independent *huf1*<sup>-/-</sup> deletion strains (KC1408) and the reintegrated strains (KC1407). Ferrozine (1 mM) induces the heme-uptake genes in *C. albicans*. The indicated strains were inoculated in triplicate with the indicated GaPPIX concentrations in 96 well plates, and incubated for 2 days at 30°C. The graph indicates the average density for each triplicate, and the error bars indicate the standard deviations. **B.** CoPPIX MIC assay of the same strains as in A. **C.** Drop dilution assay of the same strains, inoculated on YPD medium supplemented with 1 mM ferrozine and 0.1 mM CoPPIX, vs. a YPD control plate. The Petri plates were incubated at 30°C for two days.

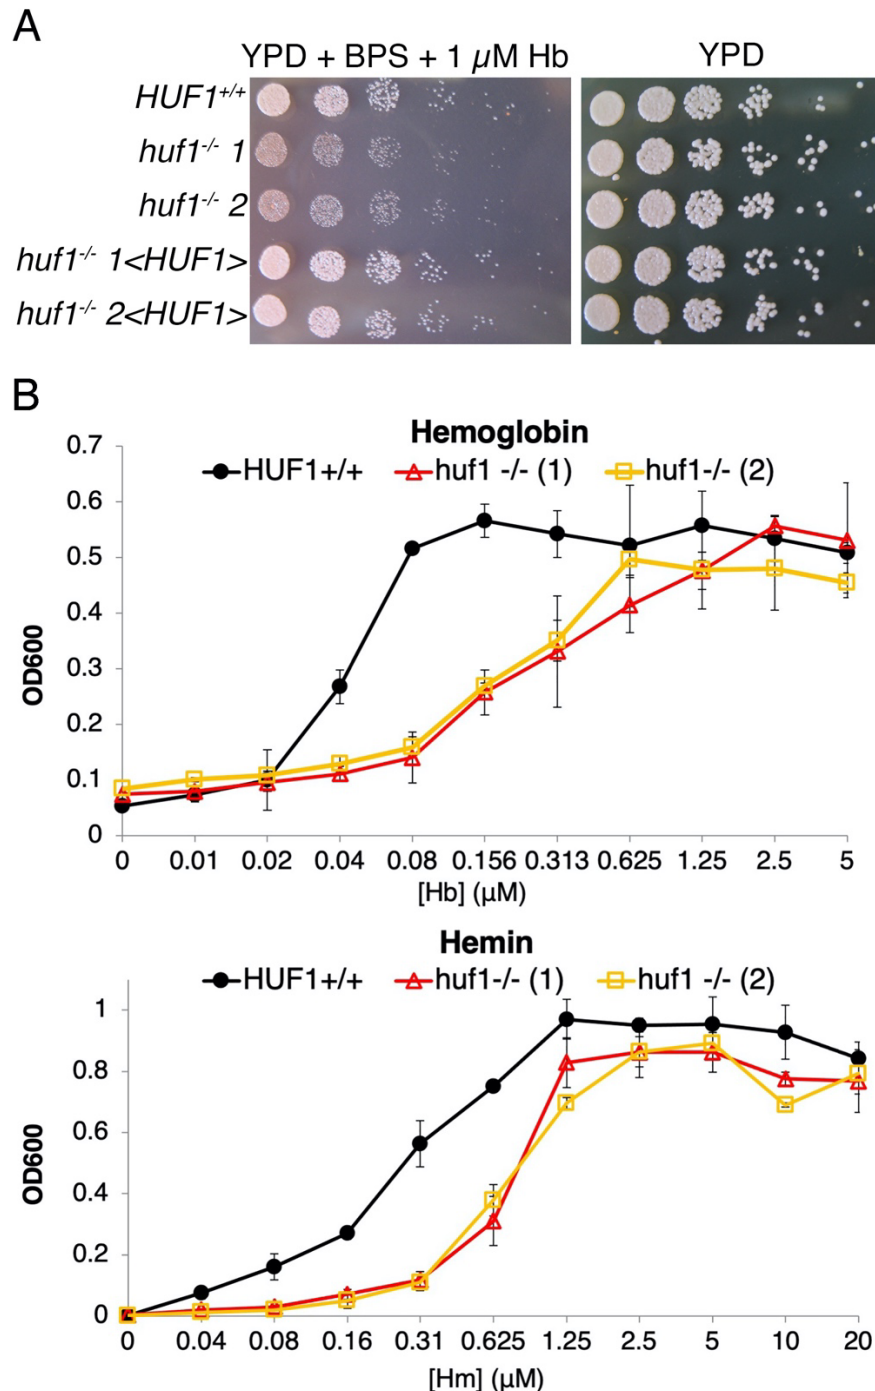

**Fig. 2.** The *huf1*<sup>-/-</sup> mutant is defective in growth on hemoglobin and hemin as iron sources. **A.** Drop dilutions of the wild-type and mutant *huf1* strains on YPD plates supplemented with the iron chelator BPS, which prevents growth of *C. albicans* due to iron limitation, and with 1  $\mu$ M hemoglobin. The same strains were used as for Fig. 1, and the Petri plates were incubated at 30°C for two days. **B.** The wild-type and mutant strains were inoculated in triplicate with the indicated hemoglobin or hemin concentrations in 96 well plates, and incubated for 2 days at 30°C. The graph indicates the average density for each triplicate, and the error bars indicate the standard deviations.

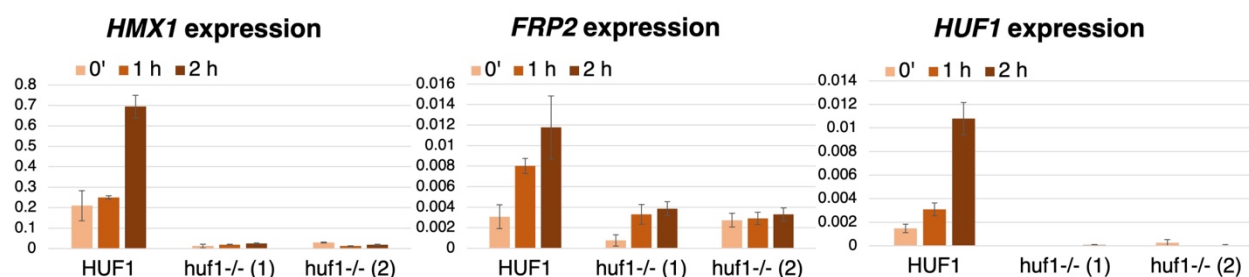

**Fig. 3.** *HUF1* affects expression of *HMX1* and *FRP2* and is itself induced by hemin. A wild-type (SN148) and two mutant strains (KC1406) exposed to 50  $\mu$ M hemin in the medium, were tested for expression of these three genes by RT-PCR at the indicated times after exposure. Expression of each sample was normalized to actin. The values are averages of three independent cultures, with error bars indicating standard deviations.

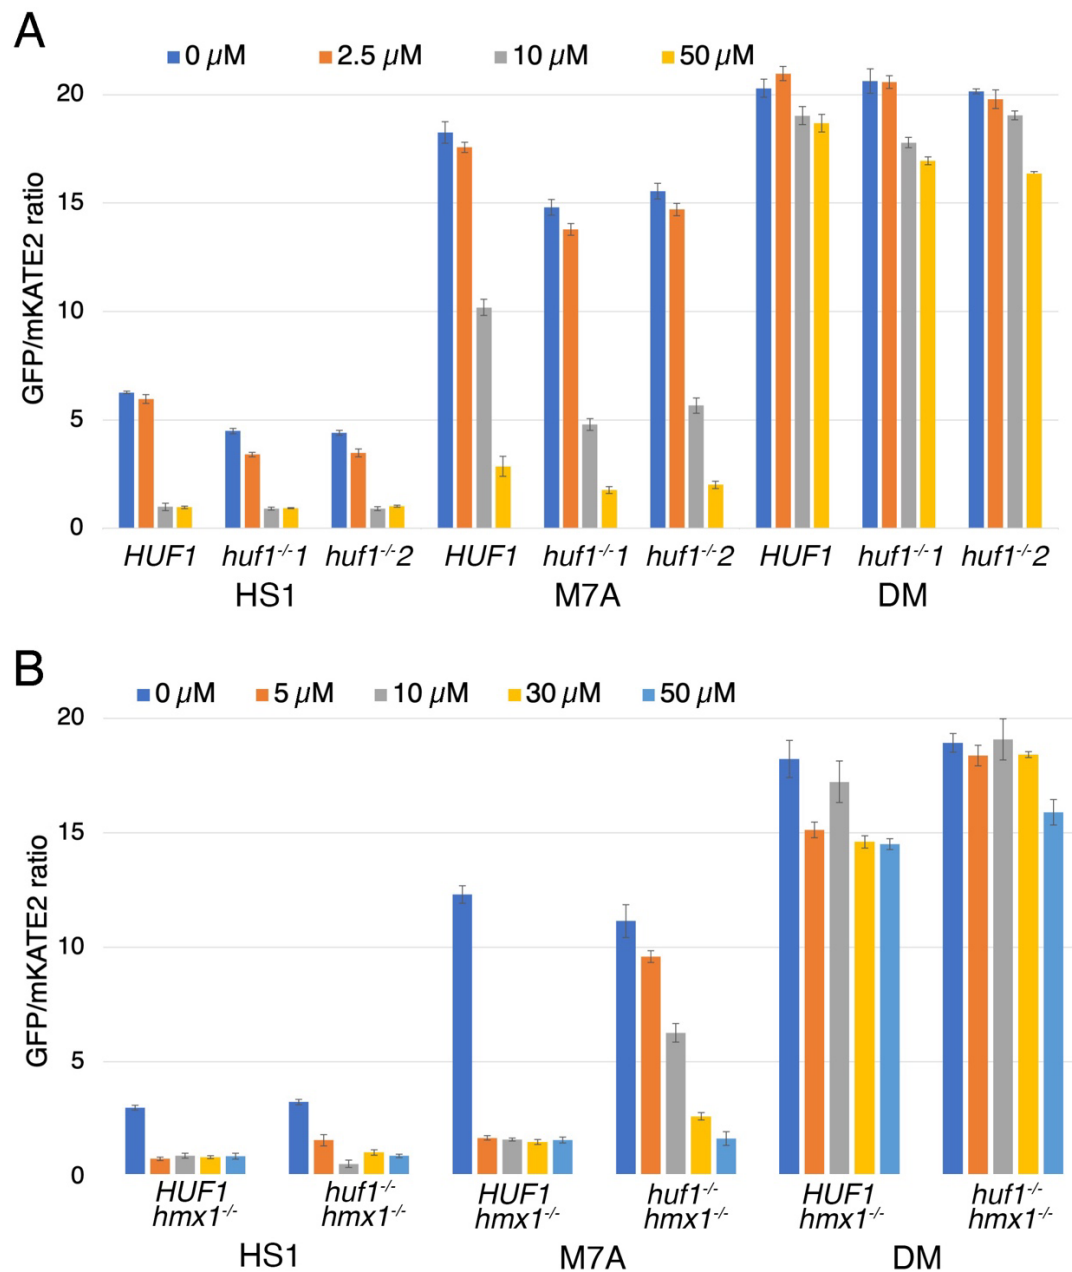

**Fig. 4.** *HUF1* affects cytoplasmic heme homeostasis and external heme uptake. **A.** Cells of the indicated phenotype (*HUF1* = SN148, *huf1*<sup>-/-</sup> = KC1406) were transformed with the HS1, M7A or DM sensor plasmids and grown in YPD + 1 mM ferrozine and the indicated hemin concentrations for 5 hours. Each data point represents the average of three independent cultures, and the error bars represent the standard deviation. **B.** Cells of the indicated phenotype (*hmx1*<sup>-/-</sup> *HUF1* = KC1251, *hmx1*<sup>-/-</sup> *huf1*<sup>-/-</sup> = KC1426) were transformed with the HS1, M7A or DM sensor plasmids and grown and assayed as in A.



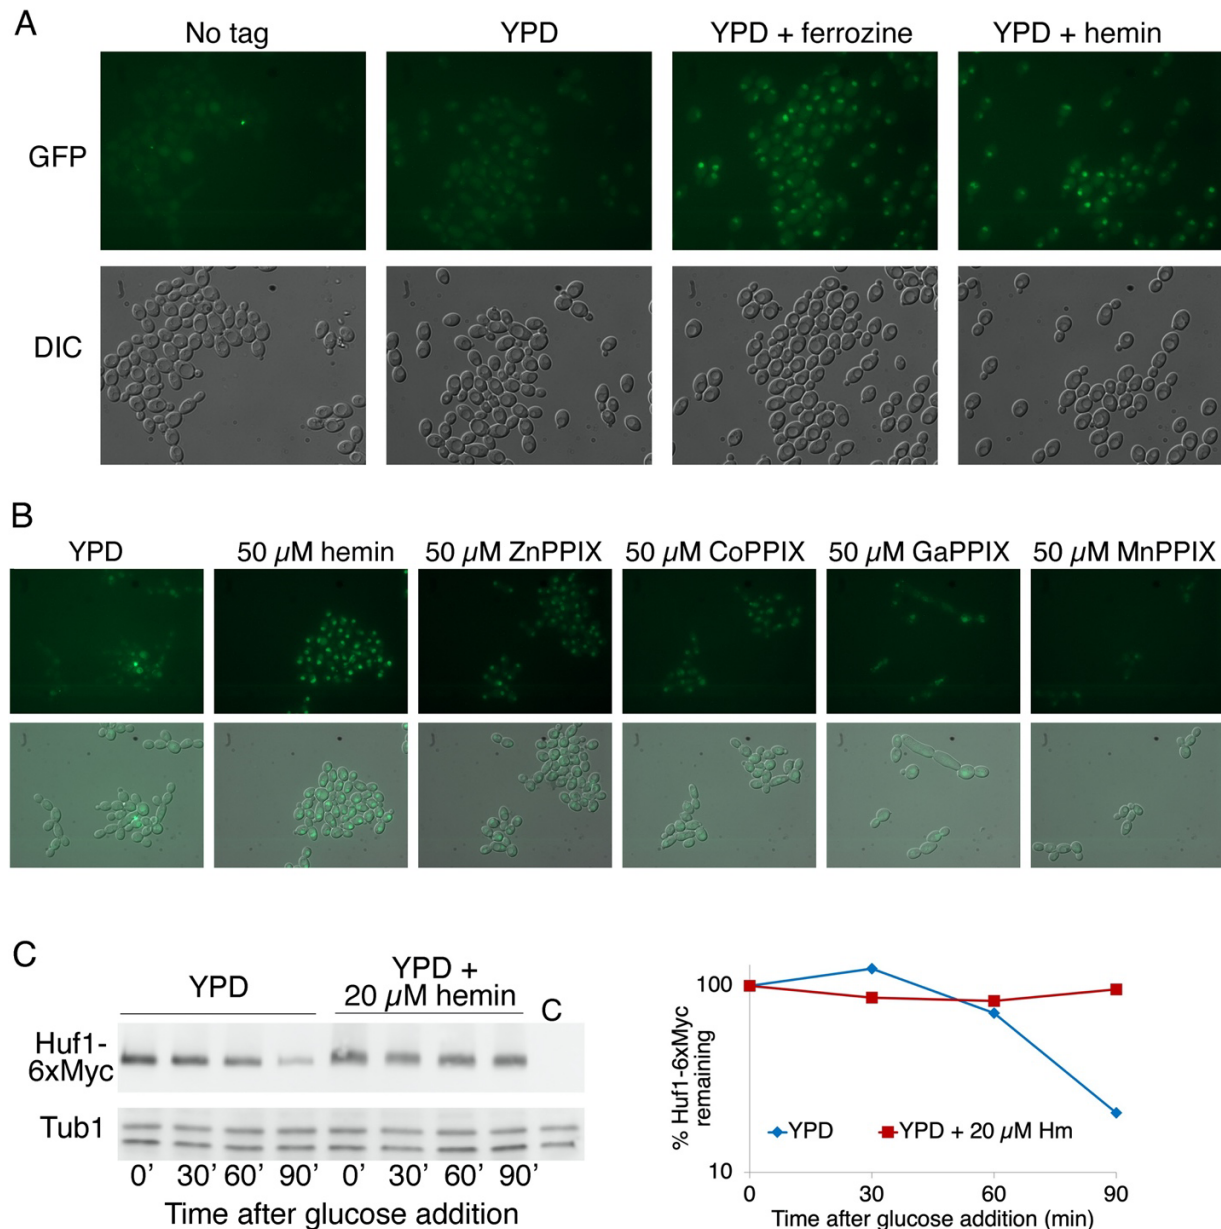

**Fig. 5.** Regulation of the Huf1 protein. **A.** Cells expressing a *HUF1-GFP* allele from its native promoter (KC1368) were grown in regular YPD medium, or in YPD supplemented with 1 mM ferrozine or with 50  $\mu$ M hemin for 4 hours, then visualized by epifluorescence microscopy. “No tag” indicates the untagged original CAI4 cells. **B.** *HUF1-GFP*-expressing cells were grown 3 h in YPD supplemented with the indicated compounds, and visualized by epifluorescence microscopy. Top panels are GFP immunofluorescence micrographs, and bottom panels are immunofluorescence overlaid over a DIC micrographs. **C.** Wild type cells carrying MAL2p-Huf1-6xMyc (KC1399), or a control strain (C=SN148) were grown overnight in YEP+ 2% raffinose at 30°C. In the morning cells were diluted to OD<sub>600</sub>=0.5 in YEP+2% maltose, with or without 20  $\mu$ M hemin and incubated for 4 hours at 30°C. Next, 2% glucose was added, and the Huf1-6xMyc protein levels were followed by Western blotting. Time 0' is immediately after glucose addition. Huf1-6xMyc was detected with the anti-Myc antibody 9E10, and the same membrane was reacted with an anti-tubulin antibody. Protein signals were visualized by chemoluminescence and quantitated. The left panel shows the membrane, and the right panel shows the ratio of Myc signal to tubulin signal, normalized to the signal at time 0' for each culture (=100%).



hierarchy is shown. Full lists are available in supplementary tables S4, S5. **B.** Venn diagram of genes induced at least twice. The four groups are: genes induced at least 2-fold in *HUF1* vs. *huf1*<sup>-/-</sup> in the presence of hemin (violet) or in regular medium (yellow) and the genes induced at least 2-fold by hemin in the *HUF1* strain (green) or in the *huf1*<sup>-/-</sup> strain (pink orange). The boxes on the left give the names of the seven genes induced by hemin and by *HUF1* with or without hemin (dark green), and by hemin and by *HUF1* in the presence of hemin only (turquoise). CFEM hemophores and ferric reductase-like genes *FRP1*, *FRP2* are in bold. The box on the right lists the GO categories enriched of genes overexpressed in the presence of hemin in both *HUF1* and *huf1*<sup>-/-</sup> cells.

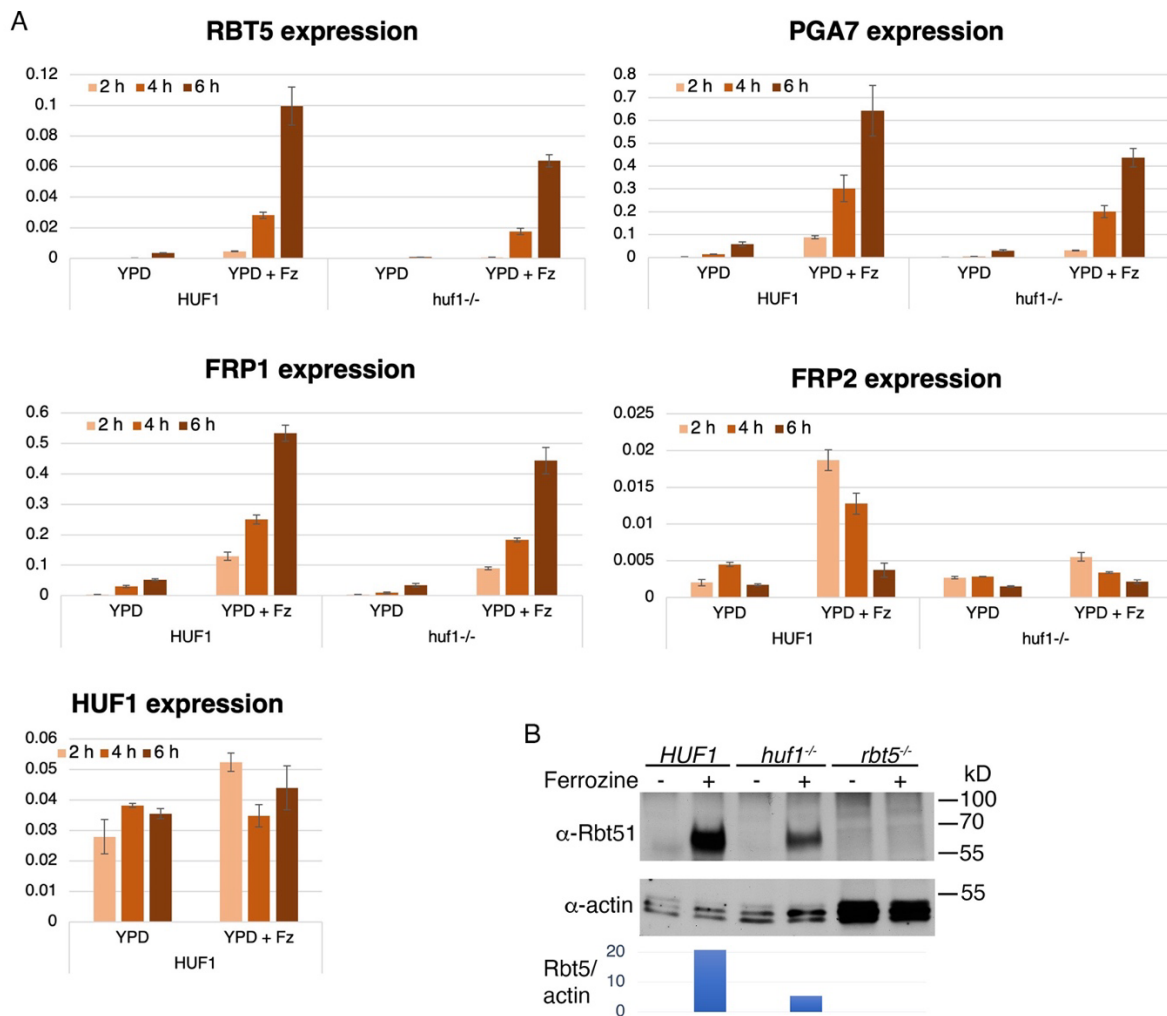

**Fig. 7.** Role of Huf1 in iron starvation-induced expression of heme uptake genes. **A.** *huf1<sup>-/-</sup>* mutant (KC1408) and reintegant (KC1407) log phase cultures were kept in YPD or shifted to YPD + 1 mM ferrozine (YPD + Fz) and aliquots were taken after 2, 4 and 6 h. Expression of the indicated genes was quantitated by RT-PCR and normalized to actin. The values are averages of three independent cultures, with error bars indicating standard deviations. **B.** *huf1<sup>-/-</sup>* mutant and reintegant strains, as well as an *rbt5<sup>-/-</sup>* strain (KC108), were grown as in A, aliquots were taken after 4 hours and the Rbt5 protein was detected with a polyclonal antibody (top panel). The actin signal was used as internal control (middle panel), and the bottom panel indicates the ratio of Rbt5 to actin signal.
